# Supplementary material for: Formation of complexes in aqueous solutions of amphiphilic triblock polyelectrolytes of different topologies and an oppositely charged protein
Source: Royal Society of Chemistry journal article supplement (doi:10.1039/c8sm00208h), 2018-01-01
Supplement: c8sm00208h1.pdf [file c8sm00208h1.pdf]

## Supplementary Material

### **Formation of complexes in aqueous solutions of amphiphilic triblock polyelectrolytes of different topologies and an oppositely charged protein**

Aristeidis Papagiannopoulos<sup>1</sup>, Maria Karayianni<sup>1</sup>, Stergios Pispas<sup>\*,1</sup>, Aurel Radulescu<sup>2</sup>

<sup>1</sup>Theoretical and Physical Chemistry Institute, National Hellenic Research Foundation, 48 Vassileos Constantinou Avenue, 11635 Athens, Greece.

<sup>2</sup>Jülich Centre for Neutron Science JCNS Forschungszentrum Jülich GmbH, Outstation at Heinz Maier-Leibnitz Zentrum (MLZ), Lichtenbergstraße 1, 85747 Garching, Germany.

Email: pispas@eie.gr

### Salt dependence

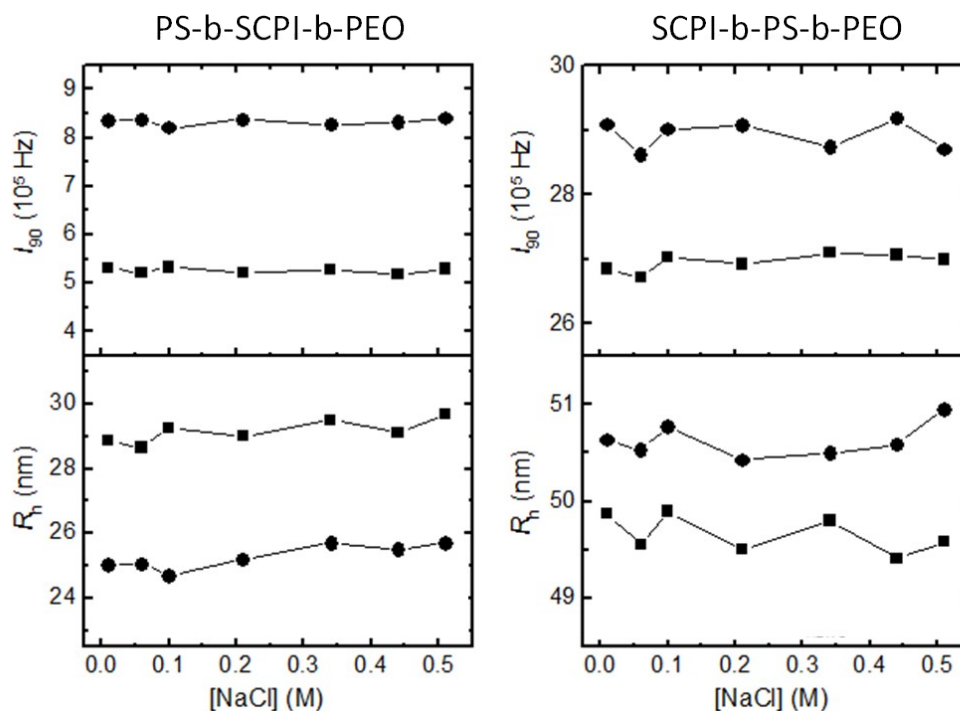

**Fig. S1** Salt content dependence for scattered intensity and  $R_h$  at  $\theta=90^\circ$  for PS-*b*-SCPI-*b*-PEO and SCPI-PS-PEO complexes with 0.05 (circles) and 0.6 (squares) mg/ml lysozyme at pH 7.

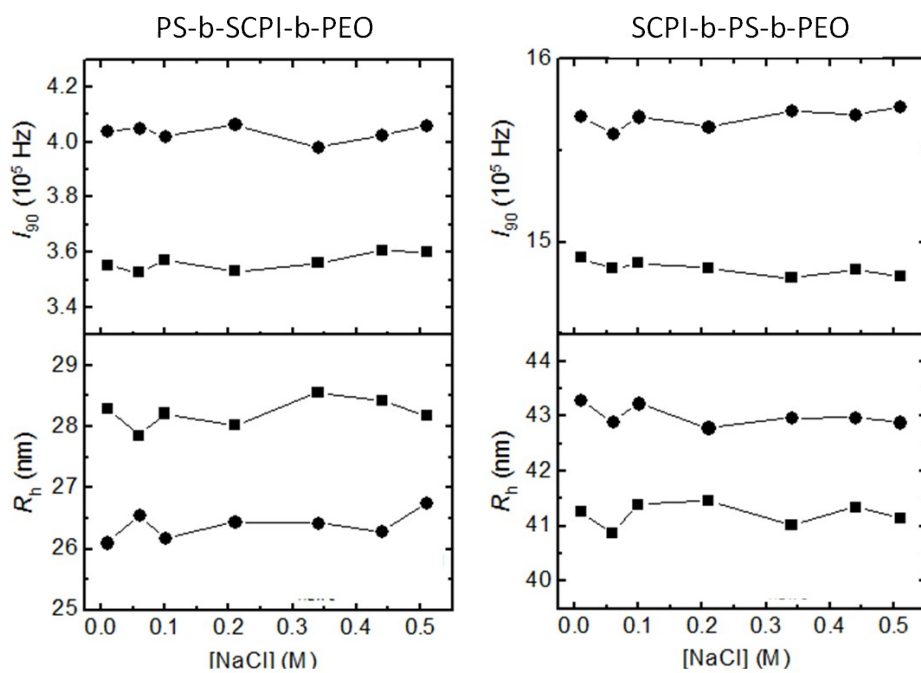

**Fig. S2** Salt content dependence for scattered intensity and  $R_g$  at  $\theta=90^\circ$  for PS-SCPI-PEO and SCPI-PS-PEO complexes with 0.05 (circles) and 0.6 (squares) mg/ml lysozyme at pH 3.

## SANS parameters

**Table S1a** SANS extracted parameters from PS-*b*-SCPI-*b*-PEO (0.075 mg/ml) in D<sub>2</sub>O at 0.01 M NaCl and pH 7 in the absence and presence of lysozyme (0.6 mg/ml).

| Parameters/Sample               | PS- <i>b</i> -SCPI- <i>b</i> -PEO | PS- <i>b</i> -SCPI- <i>b</i> -PEO/<br>Lysozyme |
|---------------------------------|-----------------------------------|------------------------------------------------|
| $R_c$ (nm)                      | 3.3±0.1                           | 3.2±0.1                                        |
| $R_{in}$ (nm)                   | 15.9±0.5                          | 14.2±0.5                                       |
| $R_{out}$ (nm)                  | 33.3±0.8                          | 26.5±0.8                                       |
| $R_{g,mic}$ (nm)                | 7.6±0.2                           | 6.1±0.2                                        |
| $\varphi_0^{SCPI}$              | 1.00±0.01                         | 0.66±0.01                                      |
| $\varphi_0^{PEO}$               | (0.99±0.2)×10 <sup>-2</sup>       | (4.6±0.2)×10 <sup>-2</sup>                     |
| $\alpha$                        | 1.4±0.1                           | 1.3±0.1                                        |
| $\beta$                         | 1.2±0.1                           | 1.2±0.1                                        |
| $N^{mic}$                       | 21±2                              | 21±2                                           |
| $I_0^{mic}$ (cm <sup>-1</sup> ) | 0.085±0.002                       | 0.21±0.01                                      |
| $G$ (cm <sup>-1</sup> )         | 0.98±0.02                         | 9.1±0.1                                        |
| $R_{g,frac}$ (nm)               | 52±3                              | 52±3                                           |
| $d$                             | 2.5±0.1                           | 2.7±0.1                                        |
| $N^{frac}$                      | 22±3                              | 820±60                                         |
| weight % NPs                    | 8.2±0.7                           | 46±3                                           |
| number % NPs                    | 8.5±0.7                           | 97±5                                           |
| $R_{g,app}$ (nm)                | 50±2                              | 49±2                                           |
| $N^{app}$                       | 22±2                              | 110±10                                         |

**Table S1b** SANS extracted parameters from SCPI-*b*-PS-*b*-PEO (0.075 mg/ml) in D<sub>2</sub>O at 0.01 M NaCl and pH 7 in the absence and presence of lysozyme (0.6 mg/ml).

| Parameters/Sample               | SCPI- <i>b</i> -PS- <i>b</i> -<br>PEO | SCPI- <i>b</i> -PS- <i>b</i> -<br>PEO/ Lysozyme |
|---------------------------------|---------------------------------------|-------------------------------------------------|
| $R_c$ (nm)                      | 7.1±0.3                               | 6.9±0.3                                         |
| $R_{in}$ (nm)                   | 17.7±0.6                              | 17.5±0.6                                        |
| $R_{out}$ (nm)                  | 31.3±0.8                              | 30.7±0.8                                        |
| $R_{g,mic}$ (nm)                | 13.9±0.4                              | 13.2±0.4                                        |
| $\varphi_{0,in}^{SCPI}$         | (6.3±0.6)·10 <sup>-1</sup>            | (6.7±0.6)·10 <sup>-1</sup>                      |
| $\varphi_0^{PEO}$               | (1.8±0.3)·10 <sup>-1</sup>            | (1.8±0.3)·10 <sup>-1</sup>                      |
| $\varphi_{0,out}^{SCPI}$        | (2.1±0.6)·10 <sup>-1</sup>            | (1.9±0.6)·10 <sup>-1</sup>                      |
| $\alpha$                        | 1.5±0.1                               | 1.5±0.1                                         |
| $\beta$                         | 2.0±0.1                               | 2.2±0.1                                         |
| $N^{mic}$                       | 182±10                                | 161±10                                          |
| %SCPI out                       | 66±5                                  | 63±5                                            |
| $I_0^{mic}$ (cm <sup>-1</sup> ) | 0.068±0.005                           | 0.26±0.06                                       |
| $G$ (cm <sup>-1</sup> )         | 0.29±0.03                             | 1.8±0.4                                         |
| $R_{g,frac}$ (nm)               | 43±6                                  | 54±4                                            |
| $d$                             | 3.2±0.2                               | 3.3±0.2                                         |
| $N^{frac}$                      | 8.5±2                                 | 71±5                                            |
| weight % mNPs                   | 0.05±0.01                             | 6.0±0.4                                         |
| number % mNPs                   | 1.0±0.2                               | 2.7±0.2                                         |
| $R_{g,app}$ (nm)                | 14±2                                  | 13±2                                            |

|           |          |         |
|-----------|----------|---------|
| $N^{app}$ | 0.78±0.4 | 5.7±0.8 |
|-----------|----------|---------|

### **CD analysis**

**Table S2** Analysis of the secondary structure of lysozyme in the complexes with PS-*b*-SCPI-*b*-PEO and SCPI-*b*-PS-*b*-PEO at 0.075 mg/ml polymer concentration, 0.01 M NaCl and pH 7.

| SAMPLE                                |                       | $\alpha$ -helix (%) | $\beta$ -sheet (%) | random coil (%) |
|---------------------------------------|-----------------------|---------------------|--------------------|-----------------|
| LYSOZYME (0.5 mg/ml)                  |                       | 33                  | 17                 | 50              |
| PS- <i>b</i> -SCPI- <i>b</i> -PEO&LYS | $C_{LYS}$ = 0.1 mg/ml | 32                  | 18                 | 50              |
|                                       | $C_{LYS}$ = 0.3 mg/ml | 32                  | 18                 | 50              |
|                                       | $C_{LYS}$ = 0.6 mg/ml | 32                  | 18                 | 50              |
| SCPI- <i>b</i> -PS- <i>b</i> -PEO&LYS | $C_{LYS}$ = 0.1 mg/ml | 33                  | 18                 | 49              |
|                                       | $C_{LYS}$ = 0.3 mg/ml | 31                  | 16                 | 53              |
|                                       | $C_{LYS}$ = 0.6 mg/ml | 32                  | 18                 | 50              |
